# Supplementary figures and images for: The 5-HTTLPR variant in the serotonin transporter gene modifies degeneration of brain regions important for emotion in behavioral variant frontotemporal dementia
Source: PubMed Central journal article supplement — Neuroimage Clin. 2015 Aug 18;9:283–90. doi: 10.1016/j.nicl.2015.07.017 (PMC4576414; doi:10.1016/j.nicl.2015.07.017), 2015-08-18

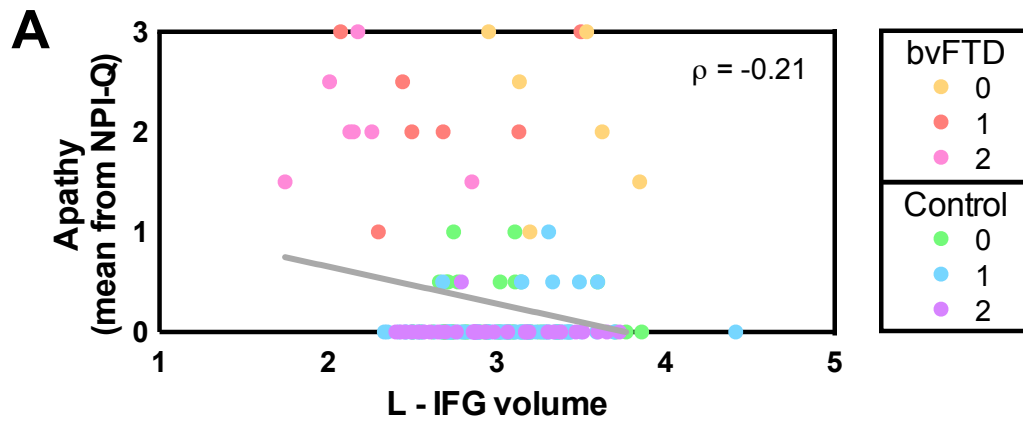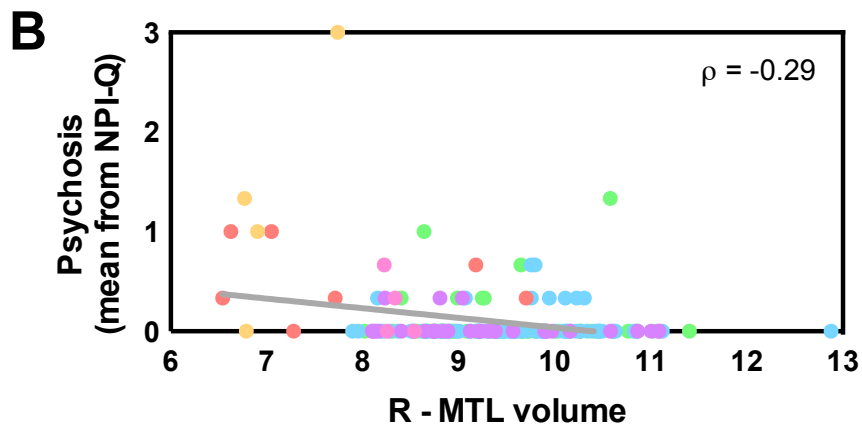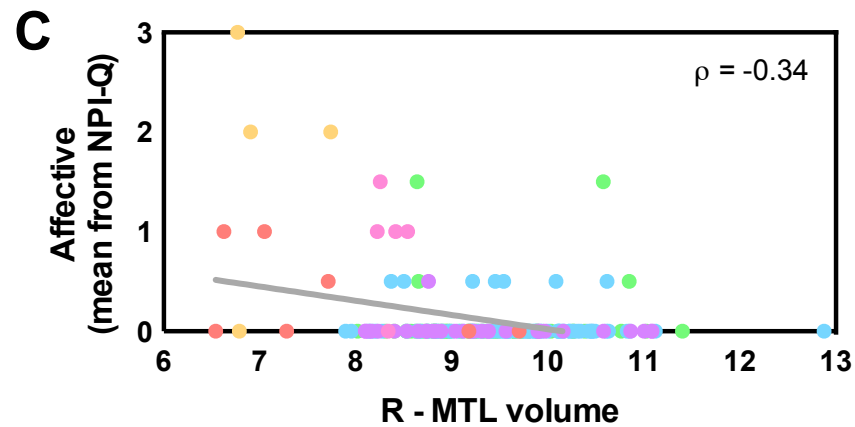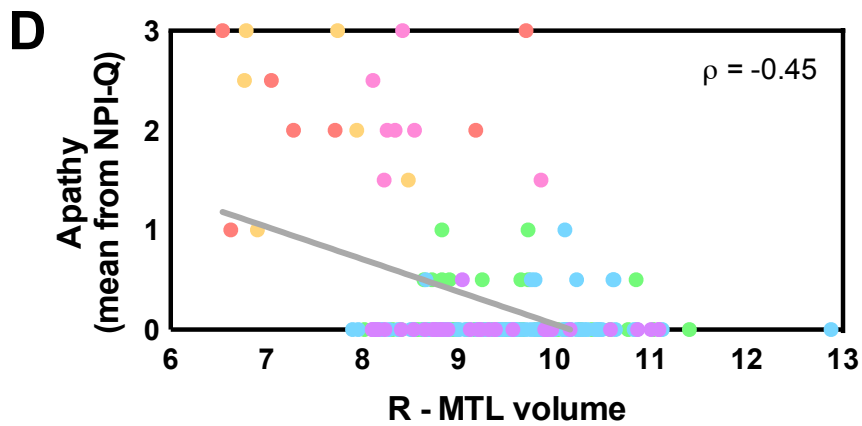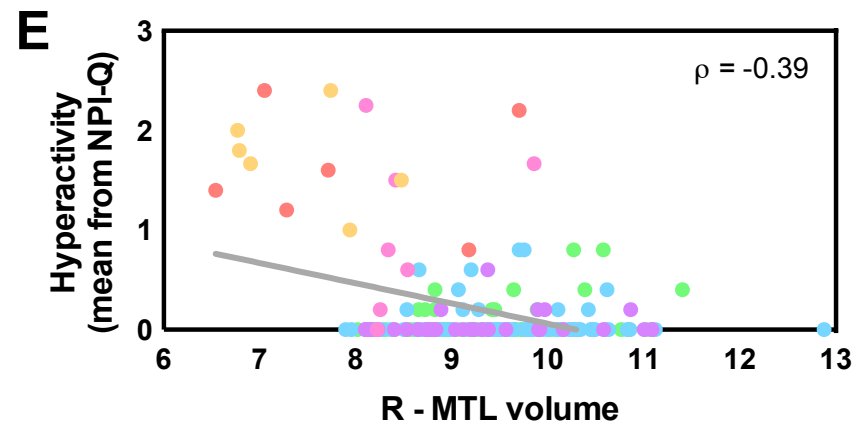

Supplement: mmc5.pdf [file mmc5.pdf]
